# Supplementary material
Source: PubMed Central journal article supplement (PMC6837873)

Figure 2c

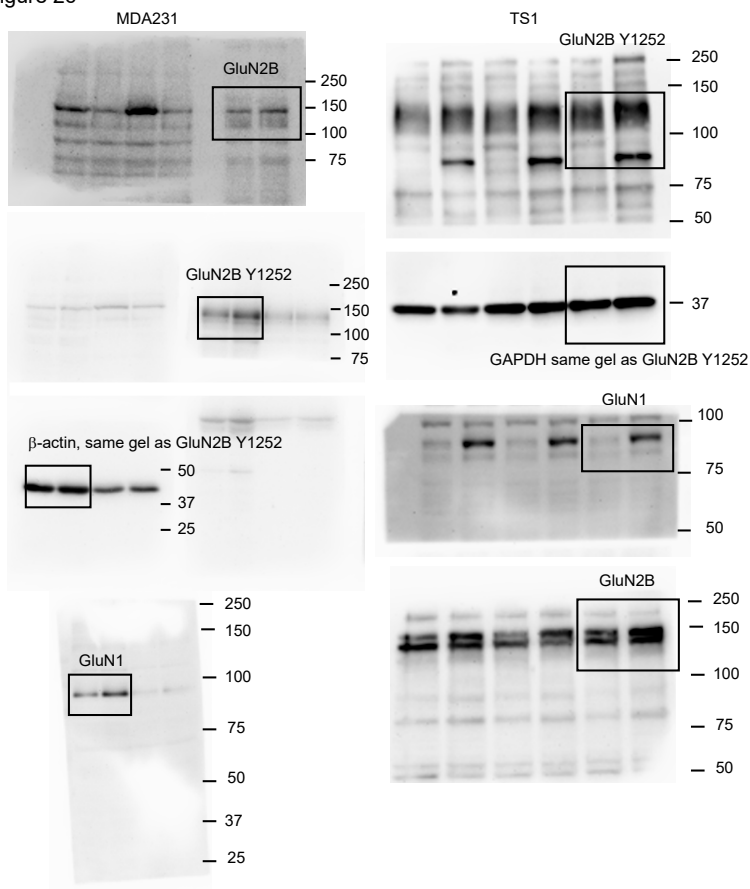

Figure 3a

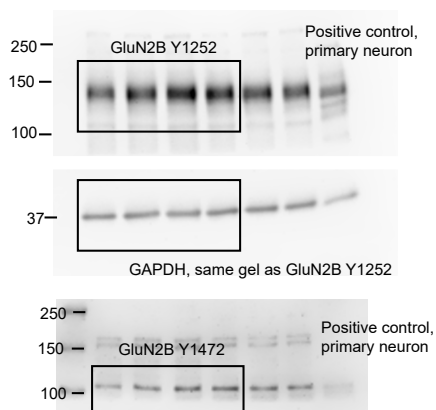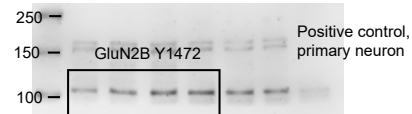

ED Figure 4a

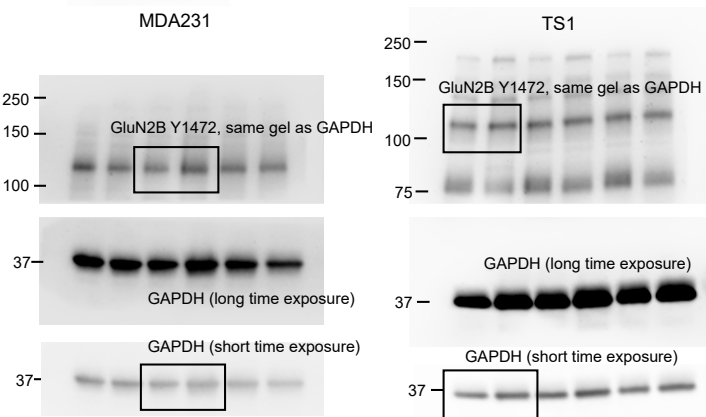

ED Figure 4a

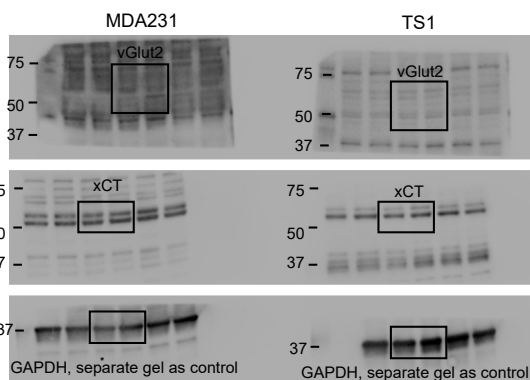

ED Figure 6i

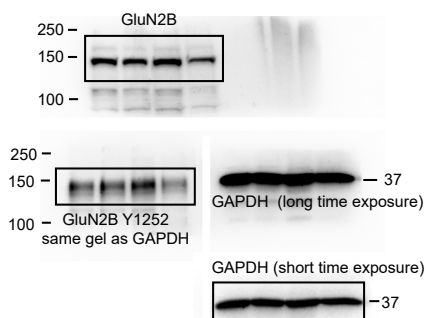

ED Figure 6k

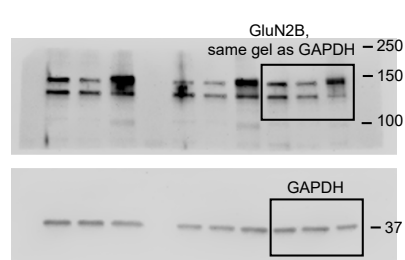

ED Figure 8a

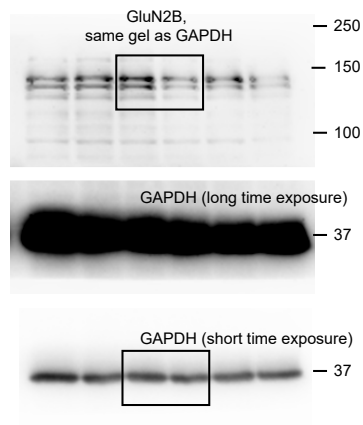

Supplement: EMS83646-supplement-Supplemantal_Figure.pdf [file EMS83646-supplement-Supplemantal_Figure.pdf]
